# Supplementary material
Source: HighWire-hosted journal article supplement (https://rapm.bmj.com/content/44/10/934)
Supplement: inline-supplementary-material-1 [file inline-supplementary-material-1.pdf]

## Appendix Table 1

ICD-9 CM codes used to identify Delirium

| ICD-9 CM diagnosis code | Description                                                                       |
|-------------------------|-----------------------------------------------------------------------------------|
| 290.11                  | Presenile dementia with delirium                                                  |
| 290.12                  | Presenile dementia with delusional features                                       |
| 290.13                  | Presenile dementia with depressive features                                       |
| 290.2                   | Senile dementia with delusional features                                          |
| 290.3                   | Senile dementia with delirium                                                     |
| 290.41                  | Vascular dementia, with delirium                                                  |
| 290.42                  | Vascular dementia, with delusions                                                 |
| 290.43                  | Vascular dementia, with depressed mood                                            |
| 290.8                   | Other specified senile psychotic conditions                                       |
| 290.9                   | Unspecified senile psychotic condition                                            |
| 291                     | Alcohol withdrawal delirium                                                       |
| 292                     | Drug withdrawal                                                                   |
| 292.11                  | Drug-induced psychotic disorder with delusions                                    |
| 292.12                  | Drug-induced psychotic disorder with hallucinations                               |
| 292.2                   | Pathological drug intoxication                                                    |
| 292.81                  | Drug-induced delirium                                                             |
| 292.82                  | Drug-induced persisting dementia                                                  |
| 293                     | Delirium due to conditions classified elsewhere                                   |
| 293.1                   | Subacute delirium                                                                 |
| 293.81                  | Psychotic disorder with delusions in conditions classified elsewhere              |
| 293.82                  | Psychotic disorder with hallucinations in conditions classified elsewhere         |
| 293.83                  | Mood disorder in conditions classified elsewhere                                  |
| 293.84                  | Anxiety disorder in conditions classified elsewhere                               |
| 293.89                  | Other specified transient mental disorders due to conditions classified elsewhere |
| 293.9                   | Unspecified transient mental disorder in conditions classified elsewhere          |
| 348.3                   | Encephalopathy, unspecified                                                       |
| 348.31                  | Metabolic encephalopathy                                                          |
| 348.39                  | Other encephalopathy                                                              |
| 349.82                  | Toxic encephalopathy                                                              |
| 780.02                  | Transient alteration of awareness                                                 |
| 780.09                  | Other alteration of consciousness                                                 |
| 780.97                  | Altered mental status                                                             |

| DRUG GROUP                   | MEDICATIONS            |
|------------------------------|------------------------|
| Short-Acting Benzodiazepines | Midazolam<br>Triazolam |

|                             |                                                                                                                                                                               |
|-----------------------------|-------------------------------------------------------------------------------------------------------------------------------------------------------------------------------|
| Long-Acting Benzodiazepines | Alprazolam<br>Chlordiazepoxide<br>Clonazepam<br>Clorazepate<br>Diazepam<br>Estazolam<br>Flurazepam<br>Halazepam<br>Lorazepam<br>Oxazepam<br>Prazepam<br>Quazepam<br>Temazepam |
| Sedative-Hypnotics          | Zaleplon<br>Zolpidem                                                                                                                                                          |
| Corticosteroids             | Methylprednisolone<br>Prednisone                                                                                                                                              |
